# Supplementary material for: Web-based Real-Time Case Finding for the Population Health Management of Patients With Diabetes Mellitus: A Prospective Validation of the Natural Language Processing–Based Algorithm With Statewide Electronic Medical Records
Source: PubMed Central journal article supplement (PMC5124114; doi:10.2196/medinform.6328), 2016-11-11
Supplement: medinform_v4i4e37_app1.pdf [file medinform_v4i4e37_app1.pdf]

Multimedia Appendix 1. A list of 100 discriminant features used by the final model as well as the feature importance, and a list of 742 NLP terms used by the initial modelling process.

### Demographics (N=2)

Age  
Gender

### Risk factors (N=5)

Smoking history  
Alcohol use disorders  
Obesity  
BMI  
High blood pressure

### Clinical history (N=1)

Encounter counts

### Medications (N=20)

pramlintide  
glipizide  
lispro  
nph insulin  
exenatide  
insulin glargine  
insulin lispro  
nateglinide  
repaglinide  
sitagliptin  
metformin  
acarbose  
aspart protamine  
insulin aspart  
eplerenone  
glimepiride  
pioglitazone  
rosiglitazone  
glyburide  
glulisine

### NLP terms (N=72)

diabetes  
type 2  
mellitus  
diabetes mellitus  
diabetic  
2 diabetes  
diabetes mellitus type 2  
diabetic ketoacidosis  
type 1  
diarrhea  
type 2 diabetes mellitus  
diabetic nephropathy  
1 diabetes  
insulin-dependent diabetes mellitus  
non-insulin-dependent  
gangrene  
250.50

diabetic retinopathy  
diabetic foot  
250.00  
type ii  
ii diabetes  
non-insulin dependent  
1 diabetic  
cystic fibrosis  
glycosuria  
iddm  
diabetic foot ulcer  
type ii diabetes mellitus  
diabetic peripheral  
diabetic neuropathy  
diabetic peripheral neuropathy  
non-insulin dependent diabetes mellitus  
mixed hyperlipidemia  
type i  
retinal detachment  
diagnosed diabetes  
newly diagnosed diabetes  
chronic diabetic  
irma  
ketonuria  
i diabetes  
diabetes mellitus type 1  
niddm  
brittle diabetes  
hypoglycemic event  
type 1 diabetes mellitus  
diabetes mellitus with neuropathy  
diabetes mellitus type ii  
acanthosis nigricans  
brittle type  
insulin treated  
insulin dependent diabetes mellitus  
diabetic ophthalmoplegia  
type i diabetes mellitus  
nonproliferative diabetic retinopathy  
proliferative diabetic retinopathy  
labile diabetes  
diabetic polyneuropathy  
diabeticorum  
photocoagulation  
diabetic renal  
mellitus poorly  
diet controlled diabetes mellitus  
ischemic ulcer  
non-insulin-dependent diabetes mellitus  
painful diabetic  
necrobiosis lipoidica diabeticorum  
mellitus well  
ischemic diabetic  
diabetic autonomic  
diabetic skin

## Feature importance of the 100 variables

| <b>XVariables</b>                   | <b>Importance in the model</b> |
|-------------------------------------|--------------------------------|
| diabetes                            | 18980.1                        |
| type 2                              | 2539.263                       |
| Age                                 | 2410.172                       |
| metformin                           | 2321.873                       |
| mellitus                            | 2271.471                       |
| diabetes mellitus                   | 2243.418                       |
| Encounter counts                    | 1726.965                       |
| Smoking history                     | 1587.573                       |
| diabetic                            | 1519.961                       |
| BMI                                 | 1174.337                       |
| 2 diabetes                          | 903.3761                       |
| Obesity                             | 522.418                        |
| Alcohol use disorders               | 414.8557                       |
| glipizide                           | 322.9788                       |
| glyburide                           | 317.946                        |
| High blood pressure                 | 230.0586                       |
| lispro                              | 143.9476                       |
| diabetes mellitus type 2            | 116.9359                       |
| diabetic ketoacidosis               | 94.08296                       |
| insulin glargine                    | 92.93966                       |
| type 1                              | 92.5705                        |
| diarrhea                            | 90.47746                       |
| type 2 diabetes mellitus            | 84.24551                       |
| diabetic nephropathy                | 67.82308                       |
| 1 diabetes                          | 52.82358                       |
| glimepiride                         | 50.82773                       |
| insulin-dependent diabetes mellitus | 49.45513                       |
| insulin lispro                      | 37.92022                       |
| non-insulin-dependent               | 36.97055                       |
| Sex                                 | 31.95784                       |
| gangrene                            | 28.86763                       |
| 250.5                               | 27.68812                       |
| diabetic retinopathy                | 19.9091                        |
| diabetic foot                       | 17.95995                       |
| 250                                 | 15.52397                       |
| nph insulin                         | 12.95181                       |
| acarbose                            | 10.43844                       |
| insulin aspart                      | 9.423584                       |
| type ii                             | 9.42223                        |

|                                         |          |
|-----------------------------------------|----------|
| pioglitazone                            | 9.133104 |
| ii diabetes                             | 7.922319 |
| non-insulin dependent                   | 6.315834 |
| 1 diabetic                              | 6.001132 |
| cystic fibrosis                         | 5.266337 |
| sitagliptin                             | 4.06094  |
| glycosuria                              | 4.028382 |
| iddm                                    | 3.622388 |
| diabetic foot ulcer                     | 3.61608  |
| type ii diabetes mellitus               | 2.921693 |
| diabetic peripheral                     | 2.673623 |
| diabetic neuropathy                     | 2.666376 |
| diabetic peripheral neuropathy          | 2.271212 |
| non-insulin dependent diabetes mellitus | 2.157529 |
| mixed hyperlipidemia                    | 1.964269 |
| type i                                  | 1.716569 |
| retinal detachment                      | 1.653132 |
| diagnosed diabetes                      | 1.39973  |
| newly diagnosed diabetes                | 1.325211 |
| chronic diabetic                        | 1.31803  |
| irma                                    | 1.095029 |
| ketonuria                               | 1.005114 |
| i diabetes                              | 0.932771 |
| diabetes mellitus type 1                | 0.924317 |
| niddm                                   | 0.911711 |
| rosiglitazone                           | 0.763531 |
| exenatide                               | 0.697849 |
| brittle diabetes                        | 0.682451 |
| hypoglycemic event                      | 0.663893 |
| type 1 diabetes mellitus                | 0.647721 |
| nateglinide                             | 0.631116 |
| diabetes mellitus with neuropathy       | 0.572632 |
| glulisine                               | 0.47036  |
| aspart protamine                        | 0.425789 |
| diabetes mellitus type ii               | 0.336795 |
| acanthosis nigricans                    | 0.315955 |
| brittle type                            | 0.214094 |
| insulin treated                         | 0.152167 |
| insulin dependent diabetes mellitus     | 0.131955 |
| eplerenone                              | 0.09404  |
| diabetic ophthalmoplegia                | 0.080033 |

|                                         |           |
|-----------------------------------------|-----------|
| type i diabetes mellitus                | 0.077895  |
| nonproliferative diabetic retinopathy   | 0.064636  |
| proliferative diabetic retinopathy      | 0.063345  |
| repaglinide                             | 0.029219  |
| labile diabetes                         | 0.022087  |
| diabetic polyneuropathy                 | 0.018121  |
| pramlintide                             | 0.014572  |
| diabeticorum                            | 0.009039  |
| photocoagulation                        | 0.008781  |
| diabetic renal                          | 0.00712   |
| mellitus poorly                         | 0.006118  |
| diet controlled diabetes mellitus       | 0.005275  |
| ischemic ulcer                          | 0.004199  |
| non-insulin-dependent diabetes mellitus | 0.003516  |
| painful diabetic                        | 0.00336   |
| necrobiosis lipoidica diabeticorum      | 0.001604  |
| mellitus well                           | 0.001165  |
| ischemic diabetic                       | 0.00047   |
| diabetic autonomic                      | 0.000447  |
| diabetic skin                           | 0.0000106 |

---

## NLP terms (N=742) used by the initial modelling process

249.00  
diabetes  
mellitus  
secondary endocrine  
endocrine diabetes  
diabetes mellitus  
249.10  
malnutrition-related diabetes  
249.40  
249.70  
249.80  
protein-deficient diabetes  
secondary diabetes  
pancreatic diabetes  
249.90  
posttransplant diabetes  
250.00  
abnormal metabolic  
brittle diabetes  
brittle type  
type 2  
2 diabetes  
type ii  
ii diabetes  
autosomal dominant  
genetic defect  
insulin action  
pregnancy childbirth  
non-steroid drugs  
diabetes-pancreatic  
exocrine dysfunction  
diabetic  
dm  
dm diabetes  
foot abnormality  
abnormality diabetes  
diabetes related  
glucose  
glucose tolerance  
herrmann syndrome  
insulin treated  
non-insulin dependent  
non-insulin-dependent  
labile diabetes  
autoimmune diabetes  
insulinopenic diabetes  
youth type  
young type  
type 1  
type 10  
type 11  
type 3  
type 4  
type 5  
type 6  
type 7  
type 8  
type 9  
mendenhall syndrome  
diabetes glucokinase-related  
mody1  
mody10  
mody11  
mody2  
mody3  
mody4  
mody5  
mody6

mody7  
mody8  
mody9  
ncdmm  
diagnosed diabetes  
niddm  
mellitus syndrome  
pre-existing diabetes  
rabson-mendenhall syndrome  
rogers syndrome  
mellitus well  
unstable diabetes  
type i  
iddm  
1 diabetes  
i diabetes  
250.02  
mellitus poorly  
250.03  
250.10  
diabetic acidosis  
diabetic ketoacidosis  
250.11  
250.20  
honks  
honks diabetic  
coma associated  
250.21  
250.23  
250.30  
diabetic coma  
hypoglycaemic coma  
insulin coma  
insulin shock  
hypoglycemic coma  
ketoacidotic coma  
250.31  
250.40  
diabetic nephropathy  
diabetic renal  
250.41  
250.50  
advanced diabetic  
diabetic maculopathy  
diabetic retinal  
background diabetic  
diabetic retinopathy  
bdr background  
diabetic cataract  
diabetic disc  
diabetic eye  
diabetic intraretinal  
diabetic iritis  
diabetic oculopathy  
diabetic ophthalmoplegia  
diabetic optic  
diabetic papillopathy  
retinal microaneurysm  
diabetic traction  
traction retinal  
retinal detachment  
vitreous haemorrhage  
diffuse diabetic  
early pdr  
exudative maculopathy  
focal diabetic  
photocoagulation  
inactive pdr  
irma  
ischaemic diabetic

ischemic diabetic  
npdr  
eye diabetic  
preproliferative diabetic  
eye proliferative  
threatening diabetic  
pappilopathy  
pdr iris  
pdr new  
pdr nvd  
pdr nve  
preproliferative retinopathy  
retinal abnormality  
severe npdr  
250.51  
250.60  
painful diabetic  
diabetic neuropathy  
asymmetric diabetic  
diabetic proximal  
diabetic amyotrophy  
diabetic asymmetric  
diabetic autonomic  
diabetic chronic  
diabetic distal  
diabetic femoral  
diabetic mixed  
diabetic mononeuritis  
diabetic mononeuropathy  
diabetic motor  
diabetic neurologic  
diabetic neuropathic  
diabetic peripheral  
diabetic polyneuropathy  
diabetic pseudotabes  
diabetic radiculopathy  
diabetic sensory  
diabetic truncal  
myasthenic syndrome  
symmetric diabetic  
1 diabetic  
250.61  
250.70  
circulatory disorder  
250.71  
gangrene  
250.80  
appenheim's disease  
ballinger-wallace  
diabeticorum  
bullosis diabeticorum  
diabetic foot  
cystic fibrosis  
genetic syndrome  
hormonal aetiology  
hormonal etiology  
diabetes deafness  
diabetic bulla  
diabetic cheirarthropathy  
diabetic cheiroarthropathy  
diabetic cheiropathy  
diabetic dermopathy  
diabetic dyslipidemia  
diabetic hand  
diabetic necrobiosis  
diabetic rubeosis  
diabetic scleredema  
diabetic skin  
diabetic thick  
skin syndrome



diabetic xanthoma  
diarrhea  
diarrhoea  
didmoad diabetes  
didmoad syndrome  
receptor ab  
erectile dysfunction  
fibrocalculous pancreatic  
genetic syndromes  
hyperglycaemic crisis  
hyperglycemic crisis  
hyperproinsulinaemia  
hyperproinsulinemia  
hypoglycaemic event  
hypoglycaemic state  
hypoglycemic event  
hypoglycemic state  
acanthosis nigricans  
ischaemic ulcer  
ischemic ulcer  
lipodystrophic diabetes  
hypoglycaemic warning  
hypoglycemic warning  
mixed hyperlipidaemia  
mixed hyperlipidemia  
nld necrobiosis  
chronic diabetic  
oppenheim-urbach disease  
soft tissue  
wolfram syndrome  
xanthoma diabeticorum  
250.81  
diabetic erectile  
diarrhea syndrome  
diarrhoea syndrome  
250.90  
diabetes mellitus  
250.91  
secondary endocrine diabetes mellitus  
malnutrition-related diabetes mellitus with ketoacidosis  
malnutrition-related diabetes mellitus with renal complications  
malnutrition-related diabetes mellitus with peripheral circulatory complications  
diabetes mellitus associated with pancreatic disease  
malnutrition-related diabetes mellitus protein-deficient  
malnutrition-related diabetes mellitus without complications  
protein-deficient diabetes mellitus  
secondary diabetes mellitus  
secondary pancreatic diabetes mellitus  
malnutrition-related diabetes mellitus with multiple complications  
posttransplant diabetes mellitus  
abnormal metabolic state in diabetes mellitus  
acrorenal field defect ectodermal dysplasia and lipotrophic diabetes  
brittle diabetes mellitus  
brittle type 2 diabetes mellitus  
brittle type ii diabetes mellitus  
diabetes mellitus adult onset  
diabetes mellitus autosomal dominant type ii  
diabetes mellitus due to genetic defect in beta cell function  
diabetes mellitus due to genetic defect in insulin action  
diabetes mellitus in mother complicating pregnancy childbirth and/or puerperium  
diabetes mellitus in mother complicating pregnancy childbirth or puerperium  
diabetes mellitus induced by non-steroid drugs  
diabetes mellitus induced by non-steroid drugs without complication  
diabetes mellitus type 2  
diabetes mellitus type 2 in nonobese  
diabetes mellitus type 2 in obese  
diabetes mellitus type ii  
diabetes mellitus without complication  
diabetes-pancreatic exocrine dysfunction syndrome  
diabetic on diet only

diabetic on oral treatment  
diet controlled diabetes mellitus  
dm diabetes mellitus  
dm induced by non-steroid drug  
foot abnormality diabetes-related  
glucose tol. test diabetic  
glucose tolerance test indicates diabetes mellitus  
insulin treated non-insulin dependent diabetes mellitus  
insulin treated type 2 diabetes mellitus  
insulin treated type ii diabetes mellitus  
insulin-treated non-insulin-dependent diabetes mellitus  
labile type ii diabetes mellitus  
latent autoimmune diabetes mellitus in adult  
lipodystrophy partial with reiger anomaly short stature and insulinopenic diabetes mellitus  
lipodystrophy partial with rieger anomaly short stature and insulinopenic diabetes mellitus  
maturity onset diabetes in youth type 2  
maturity onset diabetes in youth type ii  
maturity onset diabetes mellitus  
maturity onset diabetes of the young type 1  
maturity onset diabetes of the young type 2  
maturity-onset diabetes of the young  
maturity-onset diabetes of the young type 10  
maturity-onset diabetes of the young type 11  
maturity-onset diabetes of the young type 3  
maturity-onset diabetes of the young type 4  
maturity-onset diabetes of the young type 5  
maturity-onset diabetes of the young type 6  
maturity-onset diabetes of the young type 7  
maturity-onset diabetes of the young type 8  
maturity-onset diabetes of the young type 9  
megaloblastic anaemia thiamine-responsive with diabetes mellitus and sensorineural deafness  
megaloblastic anemia thiamine-responsive with diabetes mellitus and sensorineural deafness  
mody maturity onset diabetes glucokinase-related  
mody maturity onset diabetes in youth type 2  
mody maturity onset diabetes in youth type ii  
muscular atrophy ataxia retinitis pigmentosa and diabetes mellitus  
newly diagnosed diabetes  
niddm in obese  
niddm insulin-treated non-insulin-dependent diabetes mellitus  
niddm non-insulin dependent diabetes mellitus  
non-insulin dependent diabetes mellitus  
non-insulin dependent diabetes mellitus with arthropathy  
non-insulin-dependent diabetes mellitus  
non-insulin-dependent diabetes mellitus without complication  
on subcutaneous insulin for diabetes mellitus  
photomyoclonus diabetes mellitus deafness nephropathy and cerebral dysfunction  
pineal hyperplasia and diabetes mellitus syndrome  
pineal hyperplasia insulin-resistant diabetes mellitus and somatic abnormalities  
pre-existing diabetes mellitus in pregnancy  
pre-existing diabetes mellitus non-insulin-dependent  
pre-existing type 2 diabetes mellitus  
pre-existing type 2 diabetes mellitus in pregnancy  
pregnancy and niddm  
pregnancy and non-insulin-dependent diabetes mellitus  
pregnancy and type 2 diabetes mellitus  
type 2 diabetes mellitus  
type 2 diabetes mellitus in nonobese  
type 2 diabetes mellitus in obese  
type 2 diabetes mellitus well controlled  
type 2 diabetes mellitus with arthropathy  
type 2 diabetes mellitus without complication  
type ii diabetes mellitus  
type ii diabetes mellitus well controlled  
type ii diabetes mellitus with arthropathy  
type ii diabetes mellitus without complication  
unstable diabetes mellitus  
unstable type ii diabetes mellitus  
diabetes mellitus type 1  
diabetes mellitus type i  
iddm insulin-dependent diabetes mellitus

insulin dependent diabetes mellitus  
insulin-dependent diabetes mellitus  
juvenile onset diabetes mellitus  
type 1 diabetes mellitus  
type i diabetes mellitus  
type ii diabetes mellitus poorly controlled  
type ii diabetes mellitus uncontrolled  
type 1 diabetes mellitus uncontrolled  
type i diabetes mellitus poorly controlled  
type i diabetes mellitus uncontrolled  
diabetes mellitus with ketoacidosis  
ketoacidosis in diabetes mellitus  
ketoacidosis in insulin-dependent diabetes mellitus  
ketoacidosis in juvenile-onset type diabetes mellitus  
ketoacidosis in type 1 diabetes mellitus  
ketoacidosis in type i diabetes mellitus  
diabetes mellitus adult onset with hyperosmolar coma  
diabetes mellitus with hyperosmolar coma  
diabetic hyperosmolar non-ketotic state  
honks diabetic hyperosmolar non-ketotic state  
hyperosmolar coma associated with diabetes mellitus  
hyperosmolar non-ketotic state in type 2 diabetes mellitus  
type 2 diabetes mellitus with hyperosmolar coma  
diabetes mellitus juvenile type with hyperosmolar coma  
type 1 diabetes mellitus with hyperosmolar coma  
hyperosmolality due to uncontrolled type 1 diabetes mellitus  
coma associated with diabetes mellitus  
coma associated with malnutrition-related diabetes mellitus  
diabetic acidosis with coma  
diabetic coma with ketoacidosis  
diabetic severe hyperglycaemia  
diabetic severe hyperglycemia  
hypoglycaemic coma in diabetes mellitus  
hypoglycaemic coma in type 1 diabetes mellitus  
hypoglycaemic coma in type i diabetes mellitus  
hypoglycemic coma in diabetes mellitus  
hypoglycemic coma in type 1 diabetes mellitus  
hypoglycemic coma in type i diabetes mellitus  
ketoacidotic coma in type 2 diabetes mellitus  
ketoacidotic coma in type ii diabetes mellitus  
non-insulin dependent diabetes mellitus with hypoglycaemic coma  
non-insulin dependent diabetes mellitus with hypoglycemic coma  
non-ketotic non-hyperosmolar coma associated with diabetes mellitus  
type 2 diabetes mellitus with hypoglycaemic coma  
type 2 diabetes mellitus with hypoglycemic coma  
type ii diabetes mellitus with hypoglycaemic coma  
type ii diabetes mellitus with hypoglycemic coma  
hypoglycaemic coma in type 2 diabetes mellitus  
hypoglycaemic coma in type ii diabetes mellitus  
hypoglycemic coma in type 2 diabetes mellitus  
hypoglycemic coma in type ii diabetes mellitus  
insulin dependent diabetes mellitus with hypoglycaemic coma  
insulin dependent diabetes mellitus with hypoglycemic coma  
ketoacidotic coma in insulin-dependent diabetes mellitus  
ketoacidotic coma in juvenile-onset type diabetes mellitus  
ketoacidotic coma in type 1 diabetes mellitus  
ketoacidotic coma in type i diabetes mellitus  
type 1 diabetes mellitus with hypoglycaemic coma  
type 1 diabetes mellitus with hypoglycemic coma  
type i diabetes mellitus with hypoglycaemic coma  
type i diabetes mellitus with hypoglycemic coma  
diabetic renal disease  
renal disorder associated with diabetes mellitus  
kidney disorder associated with juvenile-onset type diabetes mellitus  
kidney disorder associated with type 1 diabetes mellitus  
renal disorder associated with insulin dependent diabetes mellitus  
renal disorder associated with type 1 diabetes mellitus  
renal disorder associated with type i diabetes mellitus  
advanced diabetic maculopathy  
advanced diabetic retinal disease

background diabetic retinopathy  
bdr background diabetic retinopathy  
diabetic cataract associated with type 2 diabetes mellitus  
diabetic cataract associated with type ii diabetes mellitus  
diabetic disc edema  
diabetic disc oedema  
diabetic eye disease  
diabetic intraretinal microvascular anomalies  
diabetic intraretinal microvascular anomaly  
diabetic macular edema  
diabetic macular edema not clinically significant  
diabetic macular oedema  
diabetic macular oedema not clinically significant  
diabetic oculopathy associated with type 2 diabetes mellitus  
diabetic oculopathy associated with type ii diabetes mellitus  
diabetic optic papillopathy  
diabetic retinal microaneurysm  
diabetic retinal venous beading  
diabetic retinopathy 12 month review  
diabetic retinopathy 6 month review  
diabetic retinopathy associated with type 2 diabetes mellitus  
diabetic retinopathy associated with type ii diabetes mellitus  
diabetic traction retinal detachment  
diabetic vitreous haemorrhage  
diabetic vitreous haemorrhage associated with type 2 diabetes mellitus  
diabetic vitreous haemorrhage associated with type ii diabetes mellitus  
diabetic vitreous hemorrhage  
diabetic vitreous hemorrhage associated with type 2 diabetes mellitus  
diabetic vitreous hemorrhage associated with type ii diabetes mellitus  
diffuse diabetic maculopathy  
dr diabetic retinopathy  
early proliferative diabetic retinopathy  
exudative maculopathy associated with type 1 diabetes mellitus  
exudative maculopathy associated with type 2 diabetes mellitus  
exudative maculopathy associated with type i diabetes mellitus  
exudative maculopathy associated with type ii diabetes mellitus  
focal diabetic maculopathy  
high risk pdr  
high risk pdr not amenable to photocoagulation  
high risk pdr not amenable to photocoagulation  
high risk proliferative diabetic retinopathy  
high risk proliferative diabetic retinopathy not amenable to photocoagulation  
high risk proliferative retinopathy  
inactive proliferative diabetic retinopathy  
intraretinal microvascular abnormality  
intraretinal microvascular anomalies  
intraretinal microvascular anomaly  
irma intraretinal microvascular anomaly  
ischaemic diabetic maculopathy  
ischemic diabetic maculopathy  
mixed diabetic maculopathy  
non proliferative diabetic retinopathy  
non-high risk pdr  
non-high risk pdr with csme  
non-high-risk pdr with no macular edema  
non-high-risk pdr with no macular oedema  
non-high-risk proliferative diabetic retinopathy with clinically significant macular edema  
non-high-risk proliferative diabetic retinopathy with clinically significant macular oedema  
non-high-risk proliferative diabetic retinopathy with no macular edema  
non-high-risk proliferative diabetic retinopathy with no macular oedema  
nonproliferative diabetic retinopathy  
nonproliferative diabetic retinopathy associated with type 2 diabetes mellitus  
nonproliferative diabetic retinopathy associated with type ii diabetes mellitus  
npdr non proliferative diabetic retinopathy  
o/e diabetic maculopathy present both eyes  
o/e left eye background diabetic retinopathy  
o/e left eye diabetic maculopathy  
o/e left eye preproliferative diabetic retinopathy  
o/e left eye proliferative diabetic retinopathy  
o/e left eye stable treated proliferative diabetic retinopathy

o/e right eye background diabetic retinopathy  
o/e right eye diabetic maculopathy  
o/e right eye proliferative diabetic retinopathy  
o/e right eye stable treated proliferative diabetic retinopathy  
o/e sight threatening diabetic retinopathy  
on examination diabetic maculopathy present both eyes  
on examination left eye background diabetic retinopathy  
on examination left eye diabetic maculopathy  
on examination left eye preproliferative diabetic retinopathy  
on examination left eye proliferative diabetic retinopathy  
on examination left eye stable treated proliferative diabetic retinopathy  
on examination right eye background diabetic retinopathy  
on examination right eye diabetic maculopathy  
on examination right eye proliferative diabetic retinopathy  
on examination right eye stable treated proliferative diabetic retinopathy  
on examination sight threatening diabetic retinopathy  
ophthalmic complication of adult-onset type diabetes mellitus  
ophthalmic complication of malnutrition-related diabetes mellitus  
ophthalmic complication of non-insulin-dependent diabetes mellitus  
ophthalmic manifestations of diabetes  
pdr high risk with csme  
pdr high risk with no macular edema  
pdr high risk with no macular oedema  
pdr iris neovascularisation  
pdr iris neovascularization  
pdr new vessels on disc  
pdr non-high risk  
pdr proliferative diabetic retinopathy  
ppdr preproliferative diabetic retinopathy  
preproliferative diabetic retinopathy  
proliferative diabetic retinopathy  
proliferative diabetic retinopathy associated with type 2 diabetes mellitus  
proliferative diabetic retinopathy associated with type ii diabetes mellitus  
proliferative diabetic retinopathy high risk  
proliferative diabetic retinopathy high risk with clinically significant macular edema  
proliferative diabetic retinopathy high risk with clinically significant macular oedema  
proliferative diabetic retinopathy high risk with no macular edema  
proliferative diabetic retinopathy high risk with no macular oedema  
proliferative diabetic retinopathy iris neovascularisation  
proliferative diabetic retinopathy iris neovascularization  
proliferative diabetic retinopathy new vessels on disc  
proliferative diabetic retinopathy non high risk  
proliferative diabetic retinopathy quiescent  
proliferative diabetic retinopathy with new vessels elsewhere than on disc  
proliferative diabetic retinopathy with new vessels on disc  
proliferative retinopathy new vessels on disc  
proliferative retinopathy with new vessels elsewhere than on disc  
proliferative retinopathy with new vessels elsewhere than on disc  
retinal abnormality diabetes-related  
retinal venous beading  
retinopathy associated with adult-onset type diabetes mellitus  
retinopathy associated with non-insulin-dependent diabetes mellitus  
severe non proliferative diabetic retinopathy  
severe nonproliferative diabetic retinopathy  
severe nonproliferative diabetic retinopathy with clinically significant macular edema  
severe nonproliferative diabetic retinopathy with clinically significant macular oedema  
severe nonproliferative diabetic retinopathy with no macular edema  
severe nonproliferative diabetic retinopathy with no macular oedema  
severe nonproliferative retinopathy  
severe npdr with csme  
severe npdr with no macular edema  
severe npdr with no macular oedema  
sight threatening diabetic retinopathy  
very severe nonproliferative diabetic retinopathy  
very severe nonproliferative diabetic retinopathy with clinically significant macular edema  
very severe nonproliferative diabetic retinopathy with clinically significant macular oedema  
very severe nonproliferative diabetic retinopathy with no macular edema  
very severe nonproliferative diabetic retinopathy with no macular oedema  
very severe npdr  
very severe npdr with csme

very severe npdr with no macular edema  
very severe npdr with no macular oedema  
very severe proliferative diabetic retinopathy  
visually threatening diabetic retinopathy  
diabetic oculopathy associated with type 1 diabetes mellitus  
diabetic oculopathy associated with type i diabetes mellitus  
acute painful diabetic neuropathy  
amyotrophy due to type 2 diabetes mellitus  
asymmetric diabetic proximal motor neuropathy  
asymptomatic diabetic neuropathy  
autonomic neuropathy due to diabetes  
chronic painful diabetic neuropathy  
diabetes mellitus with neuropathy  
diabetic acute painful polyneuropathy  
diabetic asymmetric polyneuropathy  
diabetic autonomic neuropathy  
diabetic autonomic neuropathy associated with type 1 diabetes mellitus  
diabetic autonomic neuropathy associated with type 2 diabetes mellitus  
diabetic charcot's arthropathy  
diabetic charcot's arthropathy associated with type 2 diabetes mellitus  
diabetic chronic painful polyneuropathy  
diabetic distal sensorimotor polyneuropathy  
diabetic femoral mononeuropathy  
diabetic gastroparesis associated with type 1 diabetes mellitus  
diabetic gastroparesis associated with type 2 diabetes mellitus  
diabetic mixed sensory-motor polyneuropathy  
diabetic mononeuritis multiplex  
diabetic mononeuropathy multiplex  
diabetic mononeuropathy simplex  
diabetic motor polyneuropathy  
diabetic neurologic disease  
diabetic neuropathic arthropathy  
diabetic neuropathic arthropathy associated with type 2 diabetes mellitus  
diabetic neuropathy with neurologic complication  
diabetic peripheral neuropathy  
diabetic peripheral neuropathy associated with type 2 diabetes mellitus  
diabetic peripheral neuropathy associated with type ii diabetes mellitus  
diabetic sensory polyneuropathy  
diabetic thoracic radiculopathy  
diabetic truncal radiculopathy  
mononeuropathy associated with non-insulin dependent diabetes mellitus  
mononeuropathy associated with type 2 diabetes mellitus  
mononeuropathy associated with type ii diabetes mellitus  
myasthenic syndrome due to diabetic amyotrophy  
neurologic complication of adult-onset type diabetes mellitus  
neurologic complication of diabetes mellitus  
neurologic disorder associated with diabetes mellitus  
neurologic disorder associated with type 2 diabetes mellitus  
neurologic disorder associated with type ii diabetes mellitus  
neurological disorder associated with malnutrition-related diabetes mellitus  
non-insulin dependent diabetes mellitus with neuropathic arthropathy  
polyneuropathy associated with adult-onset type diabetes mellitus  
polyneuropathy associated with juvenile-onset diabetes mellitus  
polyneuropathy associated with non-insulin dependent diabetes mellitus  
polyneuropathy associated with type 1 diabetes mellitus  
polyneuropathy associated with type 2 diabetes mellitus  
polyneuropathy associated with type i diabetes mellitus  
polyneuropathy associated with type ii diabetes mellitus  
symmetric diabetic proximal motor neuropathy  
type 1 diabetic autonomic neuropathy  
type 2 diabetes mellitus with neuropathic arthropathy  
type ii diabetes mellitus with neuropathic arthropathy  
neurologic complication of juvenile-onset diabetes mellitus  
neurological disorder associated with type 1 diabetes mellitus  
neurological disorder associated with type i diabetes mellitus  
diabetic peripheral circulatory disorder  
peripheral circulatory disorder associated with diabetes mellitus  
insulin-dependent diabetes mellitus with gangrene  
type 1 diabetes mellitus with gangrene  
type i diabetes mellitus with gangrene

angina associated with type 2 diabetes mellitus  
angina associated with type ii diabetes mellitus  
ballinger-wallace syndrome  
cellulitis in diabetic foot  
diabetes insipidus,diabetes mellitus optic atrophy and deafness  
diabetes mellitus and insipidus with optic atrophy and deafness  
diabetes mellitus associated with cystic fibrosis  
diabetes mellitus associated with genetic syndrome  
diabetes mellitus associated with hormonal aetiology  
diabetes mellitus associated with hormonal etiology  
diabetes mellitus due to cystic fibrosis  
diabetes mellitus due to insulin receptor antibodies  
diabetes-deafness syndrome maternally transmitted  
diabetic angina pectoris associated with type 2 diabetes mellitus  
diabetic dermopathy associated with diabetes mellitus type 2  
diabetic dyslipidemia associated with type 2 diabetes mellitus  
diabetic foot ulcer  
diabetic foot ulcer associated with type 2 diabetes mellitus  
diabetic foot ulcer associated with type ii diabetes mellitus  
diabetic hand syndrome  
diabetic necrobiosis lipoidica  
diabetic skin ulcer  
diabetic skin ulcer associated with type 2 diabetes mellitus  
diabetic thick skin syndrome  
diarrhea in diabetes  
diarrhoea in diabetes  
didmoad diabetes insipidus,diabetes mellitus optic atrophy and deafness  
dm due to insulin receptor ab  
dyslipidemia associated with type ii diabetes mellitus  
erectile dysfunction associated with type 2 diabetes mellitus  
fibrocalculous pancreatic diabetes  
genetic syndromes of diabetes mellitus  
hyperglycaemic crisis in diabetes mellitus  
hyperglycemic crisis in diabetes mellitus  
hypoglycaemic event in diabetes  
hypoglycaemic state in diabetes  
hypoglycemic event in diabetes  
hypoglycemic state in diabetes  
infection of foot associated with diabetes  
insulin-resistant diabetes mellitus and acanthosis nigricans  
ischaemic ulcer diabetic foot  
ischemic ulcer diabetic foot  
loss of hypoglycaemic warning  
loss of hypoglycemic warning  
malnutrition-related diabetes mellitus fibrocalculous  
marquardt-loriaux syndrome  
mixed diabetic ulcer foot  
mixed hyperlipidaemia associated with type 2 diabetes mellitus  
mixed hyperlipidaemia associated with type ii diabetes mellitus  
mixed hyperlipidemia associated with type 2 diabetes mellitus  
mixed hyperlipidemia associated with type ii diabetes mellitus  
necrobiosis lipoidica diabetorum  
neuropathic diabetic ulcer foot  
nld necrobiosis lipoidica diabetorum  
non-insulin-dependent diabetes mellitus with ulcer  
o/e left chronic diabetic foot ulcer  
o/e left diabetic foot at high risk  
o/e left diabetic foot at low risk  
o/e left diabetic foot at moderate risk  
o/e left diabetic foot at risk  
o/e left diabetic foot ulcerated  
o/e right chronic diabetic foot ulcer  
o/e right diabetic foot at high risk  
o/e right diabetic foot at low risk  
o/e right diabetic foot at moderate risk  
o/e right diabetic foot at risk  
o/e right diabetic foot ulcerated  
on examination left chronic diabetic foot ulcer  
on examination left diabetic foot at high risk  
on examination left diabetic foot at low risk

on examination left diabetic foot at moderate risk  
on examination left diabetic foot at risk  
on examination left diabetic foot ulcerated  
on examination right chronic diabetic foot ulcer  
on examination right diabetic foot at high risk  
on examination right diabetic foot at low risk  
on examination right diabetic foot at moderate risk  
on examination right diabetic foot at risk  
on examination right diabetic foot ulcerated  
pretibial pigmented patches in diabetes  
skin ulcer associated with diabetes mellitus  
skin ulcer associated with type ii diabetes mellitus  
small vessel disease due to type 2 diabetes mellitus  
soft tissue complication of diabetes mellitus  
type 2 diabetes mellitus with acanthosis nigricans  
type 2 diabetes mellitus with ulcer  
type ii diabetes mellitus with ulcer  
congenital insulin-dependent diabetes mellitus with fatal secretory diarrhea  
congenital insulin-dependent diabetes mellitus with fatal secretory diarrhoea  
diabetic erectile dysfunction associated with type 1 diabetes mellitus  
erectile dysfunction associated with type 1 diabetes mellitus  
erectile dysfunction associated with type i diabetes mellitus  
iddm insulin-dependent diabetes mellitus secretory diarrhea syndrome  
iddm insulin-dependent diabetes mellitus secretory diarrhoea syndrome  
insulin-dependent diabetes mellitus secretory diarrhea syndrome  
insulin-dependent diabetes mellitus secretory diarrhoea syndrome  
insulin-dependent diabetes mellitus with ulcer  
mixed hyperlipidaemia associated with type 1 diabetes mellitus  
mixed hyperlipidemia associated with type 1 diabetes mellitus  
small vessel disease due to type 1 diabetes mellitus  
type 1 diabetes mellitus with ulcer  
type i diabetes mellitus with ulcer  
complication of adult-onset type diabetes mellitus  
complication of type ii diabetes mellitus  
disorder associated with type 2 diabetes mellitus  
disorder associated with type ii diabetes mellitus  
disorder associated with type ii diabetes mellitus  
complication of insulin-dependent diabetes mellitus  
complication of juvenile-onset type diabetes mellitus  
complication of type i diabetes mellitus  
disorder associated with type 1 diabetes mellitus  
disorder associated with type i diabetes mellitus  
glycosuria  
ketonuria
