# Supplementary material for: Web-based Real-Time Case Finding for the Population Health Management of Patients With Diabetes Mellitus: A Prospective Validation of the Natural Language Processing–Based Algorithm With Statewide Electronic Medical Records
Source: PubMed Central journal article supplement (PMC5124114; doi:10.2196/medinform.6328), 2016-11-11
Supplement: medinform_v4i4e37_app3.pdf [file medinform_v4i4e37_app3.pdf]

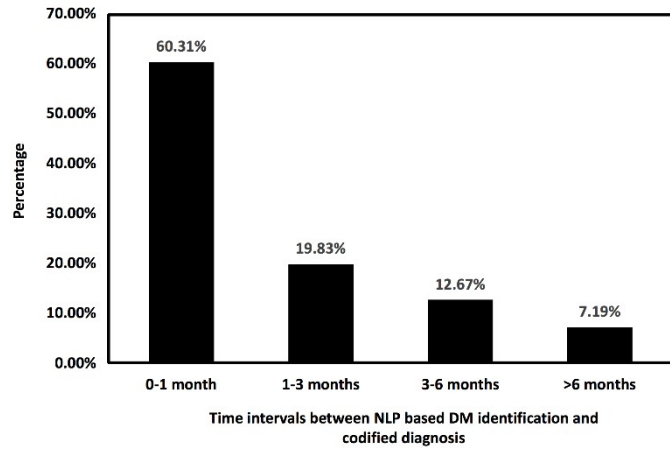

Multimedia Appendix 2. The distribution of patients by the time intervals between NLP based DM identification and codified diagnosis.
